# Supplementary material for: Adequate bowel preparation of patients undergoing screening colonoscopy
Source: Springer Nature journal article supplement (doi:10.1007/s00508-024-02468-5), 2024-12-10

**Figure S1:** Patient exclusion criteria

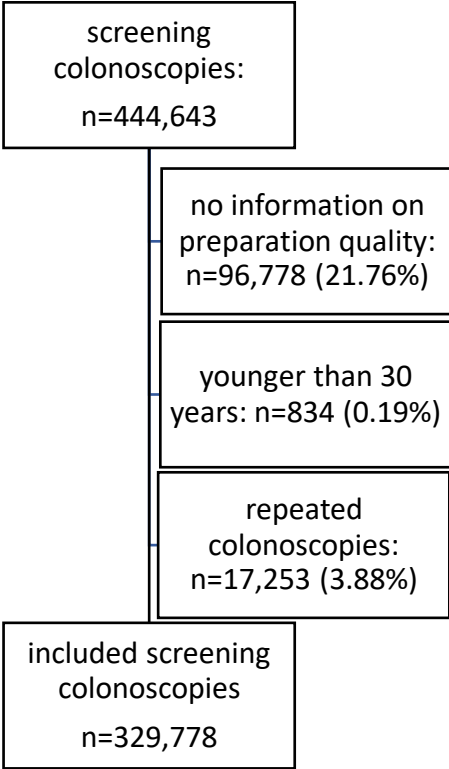

Supplement: MOESM1 [file 508_2024_2468_MOESM1_ESM.pdf]
